# Supplementary material for: ELECTRON PARAMAGNETIC RESONANCE OF Nd$sup 3+$ IONS IN LANTHANUM HYDRIDE MATRICES.
Source: Royal Society of Chemistry journal article supplement (doi:10.1039/d3ra04741e), 1971-01-01
Supplement: d3ra04741e1.pdf [file d3ra04741e1.pdf]

**Catalytic performance and antibacterial behaviour with molecular docking analysis of  
Silver and Polyacrylic acid doped Graphene quantum dots**

Tahreem Aziz<sup>a</sup>, Muhammad Imran<sup>a</sup>, Ali Haider<sup>b</sup>, Anum Shahzadi<sup>c</sup>, Muhammad Zain Ul Abidin<sup>d</sup>,  
Anwar Ul-Hamid<sup>e\*</sup>, Walid Nabgan<sup>f\*</sup>, Mohammed M Algaradah<sup>g</sup>, Ahmed M. Fouda<sup>h</sup>

Muhammad Ikram<sup>d\*</sup>

<sup>a</sup>Department of Chemistry, Government College University, Faisalabad, Pakpattan Road,  
Sahiwal, Punjab, 57000, Pakistan

<sup>b</sup>Department of Clinical Sciences, Faculty of Veterinary and Animal Sciences, Muhammad  
Nawaz Shareef, University of Agriculture, Multan 66000, Punjab, Pakistan

<sup>c</sup>Faculty of Pharmacy, The university of Lahore, Lahore, 54000, Pakistan

<sup>d</sup>Solar Cell Applications Research Lab, Department of Physics, Government College University  
Lahore, Lahore 54000, Punjab, Pakistan

<sup>e</sup>Core Research Facilities, King Fahd University of Petroleum & Minerals, Dhahran 31261,  
Saudi Arabia

<sup>f</sup>Departament d'Enginyeria Química, Universitat Rovira i Virgili, Av Països Catalans 26, 43007  
Tarragona, Spain

<sup>g</sup>Chemistry Department, Faculty of Science, King Khalid University, Abha 61413, Saudi Arabia

<sup>h</sup>Chemistry Department, Faculty of Science, King Khalid University, Abha 61413, Saudi Arabia

Corresponding author email: [dr.muhammadikram@gcu.edu.pk](mailto:dr.muhammadikram@gcu.edu.pk)

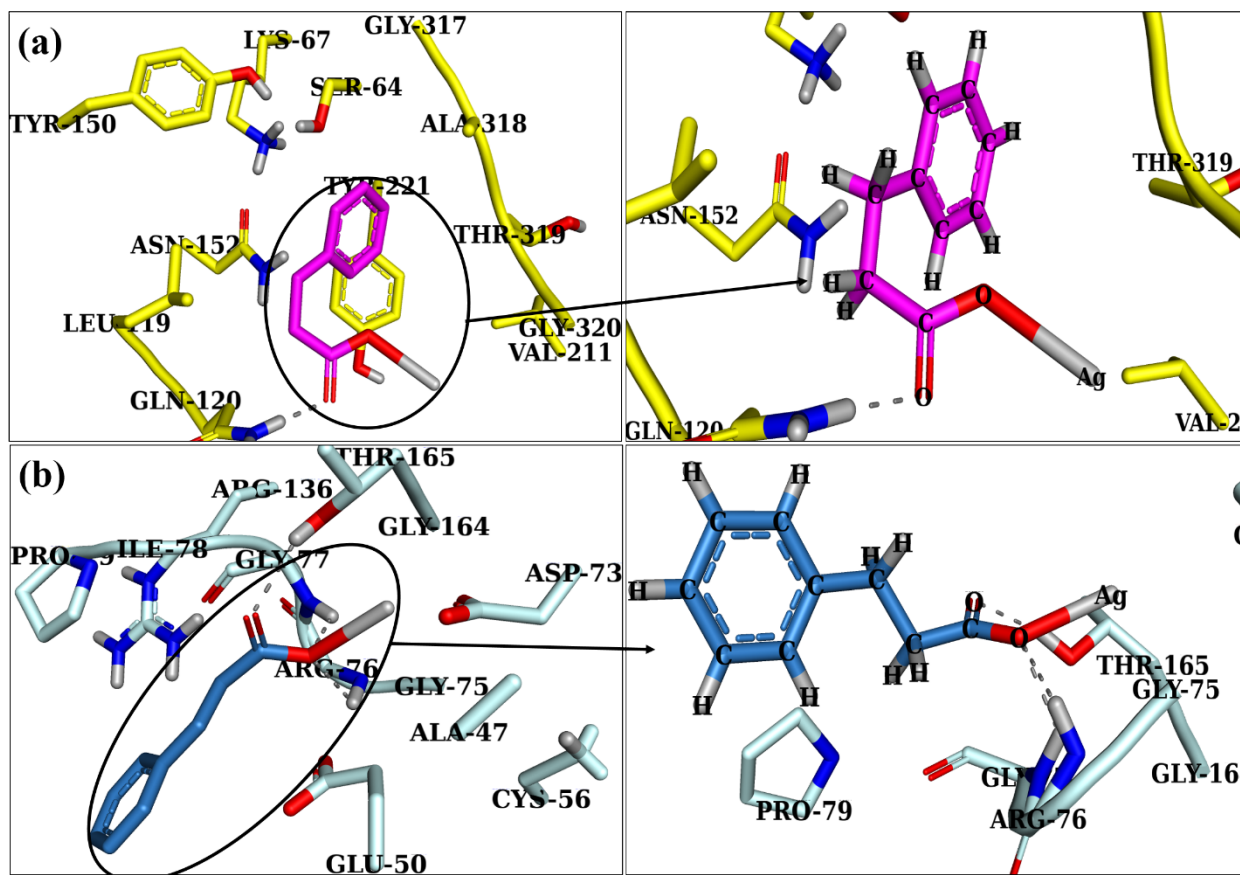

Fig S1. Binding interaction pattern of ligand with active site residues of  $\beta$ -lactamase (a) and DNA gyrase (b) enzyme from *E. coli*.

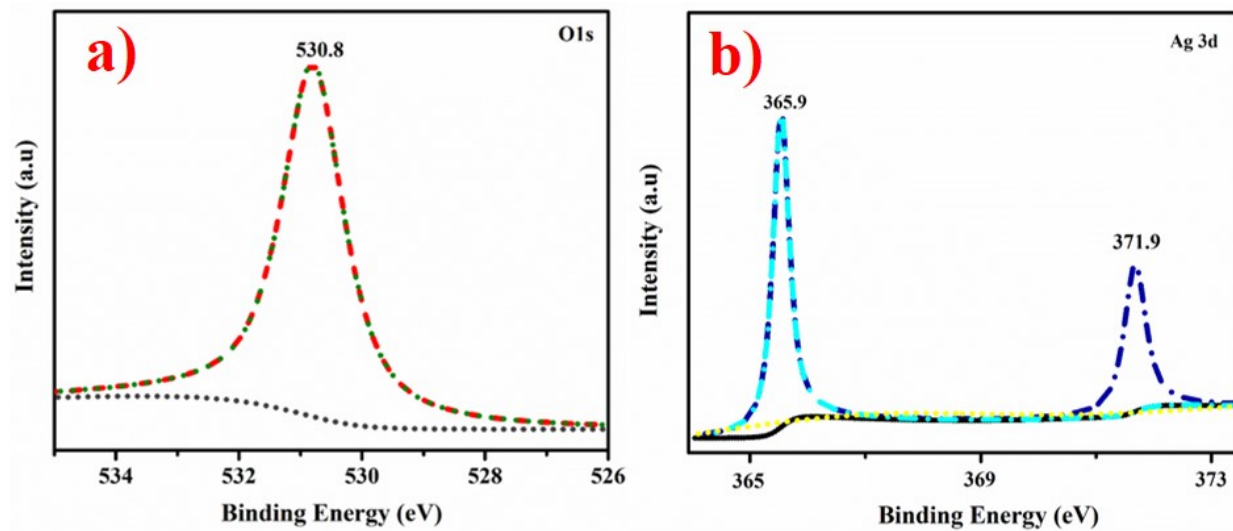

Fig S2. XPS spectra of as PAA/Ag-GQDs (a) O1s (b) Ag 3d

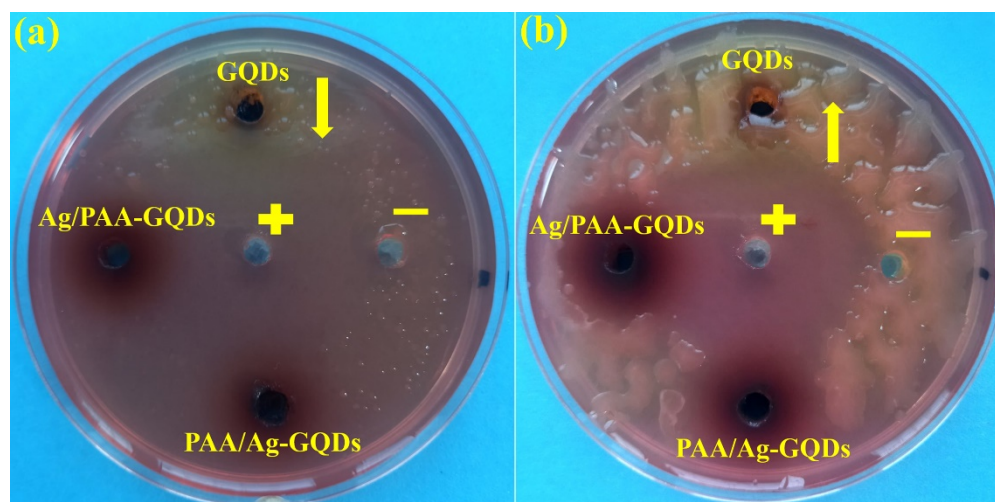

Fig S3. In vitro antimicrobial activity of the prepared sample against (a) *S. Aureus* at low dose (b) *S. Aureus* at high dose.

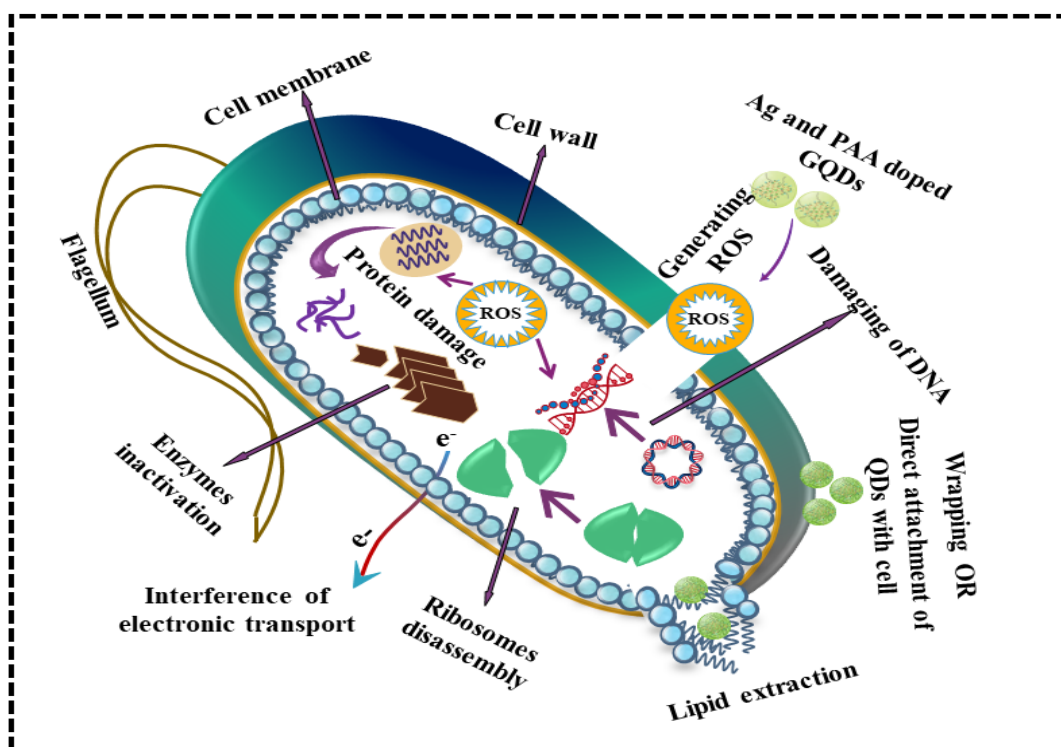

Fig S4. Antibacterial mechanism of GQDs, Ag: PAA GQDs, and PAA: Ag GQDs
